# Supplementary material for: The paradox of assessing greenhouse gases from soils for nature-based solutions
Source: Copernicus journal article supplement (doi:10.5194/bg-20-15-2023), 2023-01-03
Supplement: Supplementary file 1 [file bg-20-15-2023-supplement.pdf]

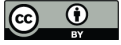

*Supplement of*

## **The paradox of assessing greenhouse gases from soils for nature-based solutions**

**Rodrigo Vargas and Van Huong Le**

*Correspondence to:* Rodrigo Vargas (rvargas@udel.edu)

The copyright of individual parts of the supplement might differ from the article licence.

17 **Supplementary Tables and Figures**

18

19 **Table S1.** Statistical properties for automated measurements of soil CO<sub>2</sub> ( $F_A$  CO<sub>2</sub>), soil CH<sub>4</sub>  
 20 ( $F_A$  CH<sub>4</sub>), and soil N<sub>2</sub>O ( $F_A$  N<sub>2</sub>O) fluxes, optimized samples ( $k=12, 28, 48$ ) using a temporal  
 21 univariate Latin Hypercube sampling (*tuLHs*), and fixed temporal stratification ( $k=12, 28,$   
 22  $48$ ). Units for soil CO<sub>2</sub> fluxes are in  $\mu\text{mol m}^{-2} \text{s}^{-1}$ , and for soil CH<sub>4</sub> and N<sub>2</sub>O fluxes in  $\text{nmol m}^{-2} \text{s}^{-1}$ .  
 23  
 24

|                                                  | Number of measurements ( $k$ ) | 1st. Quartile | Median | Mean  | 3rd. Quartile | Standard Deviation |
|--------------------------------------------------|--------------------------------|---------------|--------|-------|---------------|--------------------|
| $F_A \text{CO}_2$                                | 8259                           | 2.81          | 5.03   | 5.87  | 8.65          | 3.85               |
| <i>tuLHs</i> approach (CO <sub>2</sub> )         | 12                             | 3.19          | 5.30   | 6.25  | 8.88          | 4.06               |
|                                                  | 24                             | 3.00          | 5.13   | 5.93  | 8.44          | 3.90               |
|                                                  | 48                             | 2.84          | 4.97   | 5.88  | 8.54          | 3.87               |
| Fixed temporal stratification (CO <sub>2</sub> ) | 12                             | 2.68          | 5.82   | 5.37  | 7.10          | 3.15               |
|                                                  | 24                             | 2.69          | 5.66   | 5.50  | 7.07          | 3.24               |
|                                                  | 48                             | 2.69          | 5.53   | 5.45  | 8.05          | 3.29               |
| $F_A \text{CH}_4$                                | 8259                           | -1.14         | -0.92  | -0.93 | -0.67         | 0.36               |
| <i>tuLHs</i> approach (CH <sub>4</sub> )         | 12                             | -1.11         | -0.89  | -0.87 | -0.66         | 0.33               |
|                                                  | 24                             | -1.14         | -0.92  | -0.94 | -0.66         | 0.34               |
|                                                  | 48                             | -1.13         | -0.91  | -0.92 | -0.66         | 0.35               |
| Fixed temporal stratification (CH <sub>4</sub> ) | 12                             | -1.01         | -0.83  | -0.83 | -0.67         | 0.27               |
|                                                  | 24                             | -1.01         | -0.89  | -0.86 | -0.68         | 0.26               |
|                                                  | 48                             | -1.10         | -0.86  | -0.88 | -0.66         | 0.29               |
| $F_A \text{N}_2\text{O}$                         | 8259                           | -0.18         | 0.01   | 0.45  | 0.49          | 1.62               |
| <i>tuLHs</i> approach (N <sub>2</sub> O)         | 12                             | -0.18         | -0.01  | 0.58  | 0.50          | 1.58               |
|                                                  | 24                             | -0.18         | 0.03   | 0.51  | 0.45          | 1.54               |
|                                                  | 48                             | -0.17         | 0.02   | 0.49  | 0.45          | 1.54               |
| Fixed temporal stratification (N <sub>2</sub> O) | 12                             | -0.35         | 0.51   | 0.59  | 0.83          | 1.38               |
|                                                  | 24                             | -0.21         | -0.08  | 0.61  | 0.36          | 1.97               |
|                                                  | 48                             | -0.31         | 0.00   | 0.25  | 0.53          | 0.91               |

25

26 **Table S2.** Comparison of errors between experimental variogram for automated  
 27 measurements of soil greenhouse gases ( $F_A$ ;  $k=8259$ ) and experimental variograms for data  
 28 using temporal univariate Latin Hypercube sampling (*tuLHs*) and fixed temporal  
 29 stratification.  
 30

|                                 | <b>Approach</b> | <b>Number of measurements<br/>(<i>k</i>)</b> | <b>Error<br/>(Sum of absolute differences)</b> |
|---------------------------------|-----------------|----------------------------------------------|------------------------------------------------|
| Soil CO <sub>2</sub><br>fluxes  | Fixed           | 12                                           | 69.31                                          |
|                                 |                 | 24                                           | 54.39                                          |
|                                 |                 | 48                                           | 49.42                                          |
|                                 | <i>tuLHs</i>    | 12                                           | 5.69                                           |
|                                 |                 | 24                                           | 1.99                                           |
|                                 |                 | 48                                           | 1.39                                           |
| Soil CH <sub>4</sub><br>fluxes  | Fixed           | 12                                           | 0.63                                           |
|                                 |                 | 24                                           | 0.68                                           |
|                                 |                 | 48                                           | 0.49                                           |
|                                 | <i>tuLHs</i>    | 12                                           | 0.06                                           |
|                                 |                 | 24                                           | 0.04                                           |
|                                 |                 | 48                                           | 0.02                                           |
| Soil N <sub>2</sub> O<br>fluxes | Fixed           | 12                                           | 10.01                                          |
|                                 |                 | 24                                           | 12.25                                          |
|                                 |                 | 48                                           | 16.75                                          |
|                                 | <i>tuLHs</i>    | 12                                           | 0.82                                           |
|                                 |                 | 24                                           | 1.13                                           |
|                                 |                 | 48                                           | 3.57                                           |

31  
 32  
 33  
 34

35 **Table S3.** Cumulative sum and associated uncertainty of greenhouse gas (GHG) fluxes  
 36 derived from automated measurements ( $F_A$ ) and using an optimized sampling approach  
 37 ( $tuLHs$ ) or a fixed temporal stratification. The cumulative sum represents the total flux from  
 38 available measurements derived from automated measurements for all GHG fluxes.  
 39  
 40

|                                                                      | Number of measurements ( $k$ ) | Cumulative Sum | Uncertainty 95% CI |       | Uncertainty Range |
|----------------------------------------------------------------------|--------------------------------|----------------|--------------------|-------|-------------------|
| $F_A CO_2$<br>(g CO <sub>2</sub> m <sup>2</sup> )                    | 8259                           | 5758           | 893                | 13860 | 12966             |
| $tuLHs$<br>approach<br>(g CO <sub>2</sub> m <sup>2</sup> )           | 12                             | 6130           | 1423               | 13218 | 11794             |
|                                                                      | 24                             | 5818           | 1046               | 13438 | 12391             |
|                                                                      | 48                             | 5766           | 946                | 13429 | 12482             |
| Fixed temporal stratification<br>(g CO <sub>2</sub> m <sup>2</sup> ) | 12                             | 5273           | 1376               | 10117 | 8740              |
|                                                                      | 24                             | 5402           | 1196               | 11356 | 10160             |
|                                                                      | 48                             | 5351           | 1162               | 11621 | 10458             |
| $F_A CH_4$<br>(g CH <sub>4</sub> m <sup>2</sup> )                    | 8259                           | -0.33          | -0.58              | -0.14 | 0.44              |
| $tuLHs$<br>approach<br>(g CH <sub>4</sub> m <sup>2</sup> )           | 12                             | -0.31          | -0.49              | -0.12 | 0.37              |
|                                                                      | 24                             | -0.33          | -0.57              | -0.16 | 0.41              |
|                                                                      | 48                             | -0.33          | -0.56              | -0.14 | 0.42              |
| Fixed temporal stratification<br>(g CH <sub>4</sub> m <sup>2</sup> ) | 12                             | -0.3           | -0.45              | -0.15 | 0.3               |
|                                                                      | 24                             | -0.31          | -0.46              | -0.14 | 0.32              |
|                                                                      | 48                             | -0.32          | -0.51              | -0.14 | 0.37              |
| $F_A N_2O$<br>(g N <sub>2</sub> O m <sup>2</sup> )                   | 8259                           | 0.44           | -0.53              | 3.67  | 4.2               |
| $tuLHs$<br>approach<br>(g N <sub>2</sub> O m <sup>2</sup> )          | 12                             | 0.57           | -0.48              | 4.19  | 4.67              |
|                                                                      | 24                             | 0.5            | -0.43              | 4.35  | 4.78              |
|                                                                      | 48                             | 0.48           | -0.5               | 3.58  | 4.08              |
|                                                                      | 12                             | -0.3           | -0.83              | 3.52  | 4.35              |
|                                                                      | 24                             | -0.31          | -0.43              | 4.86  | 5.29              |

|                                                                    |    |       |      |      |      |
|--------------------------------------------------------------------|----|-------|------|------|------|
| Fixed temporal stratification (g N <sub>2</sub> O m <sup>2</sup> ) | 48 | -0.32 | -0.7 | 2.21 | 2.91 |
|--------------------------------------------------------------------|----|-------|------|------|------|

41

42

43

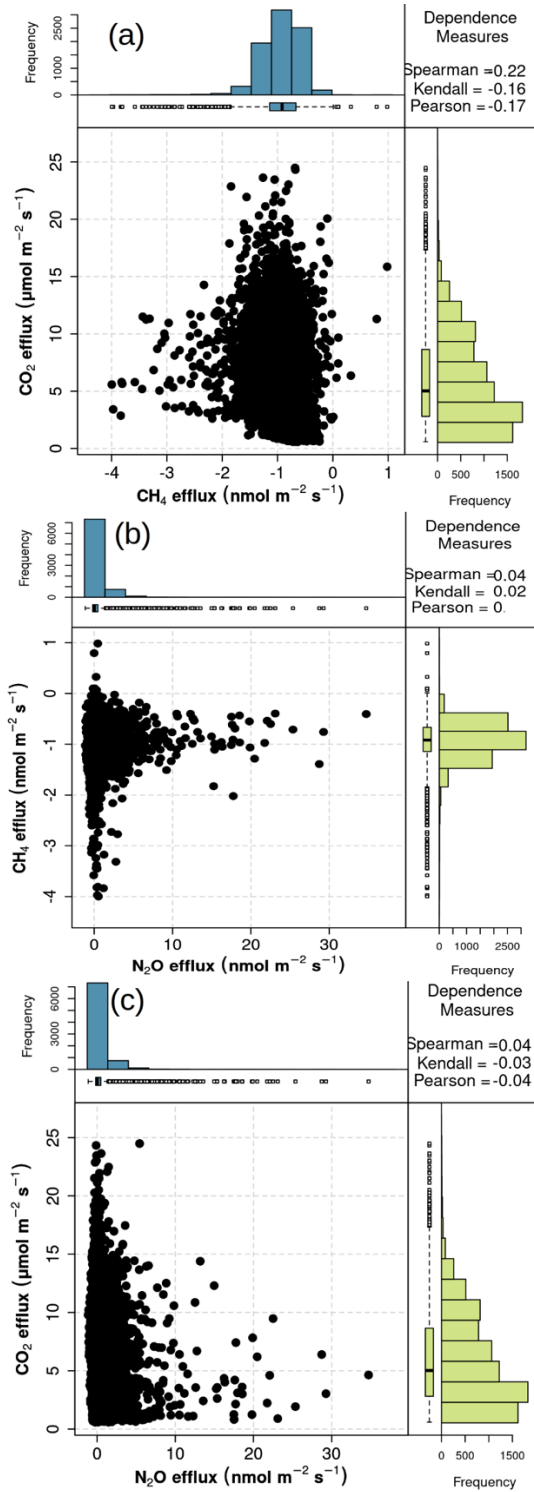

45

46

47 **Figure S1.** Relationships between soil  $\text{CO}_2$  ( $F_A \text{CO}_2$ ) with soil  $\text{CH}_4$  ( $F_A \text{CH}_4$ ) fluxes (a), soil  $\text{CH}_4$   
 48 ( $F_A \text{CH}_4$ ) with soil  $\text{N}_2\text{O}$  ( $F_A \text{N}_2\text{O}$ ) fluxes (b), and soil  $\text{CO}_2$  ( $F_A \text{CO}_2$ ) with soil  $\text{N}_2\text{O}$  ( $F_A \text{N}_2\text{O}$ )  
 49 fluxes. None of these relationships were significant at  $\alpha=0.05$ . These relationships were derived  
 50 using all available data from automated measurements ( $F_A$ ) of soil greenhouse gas fluxes. <sup>6</sup>

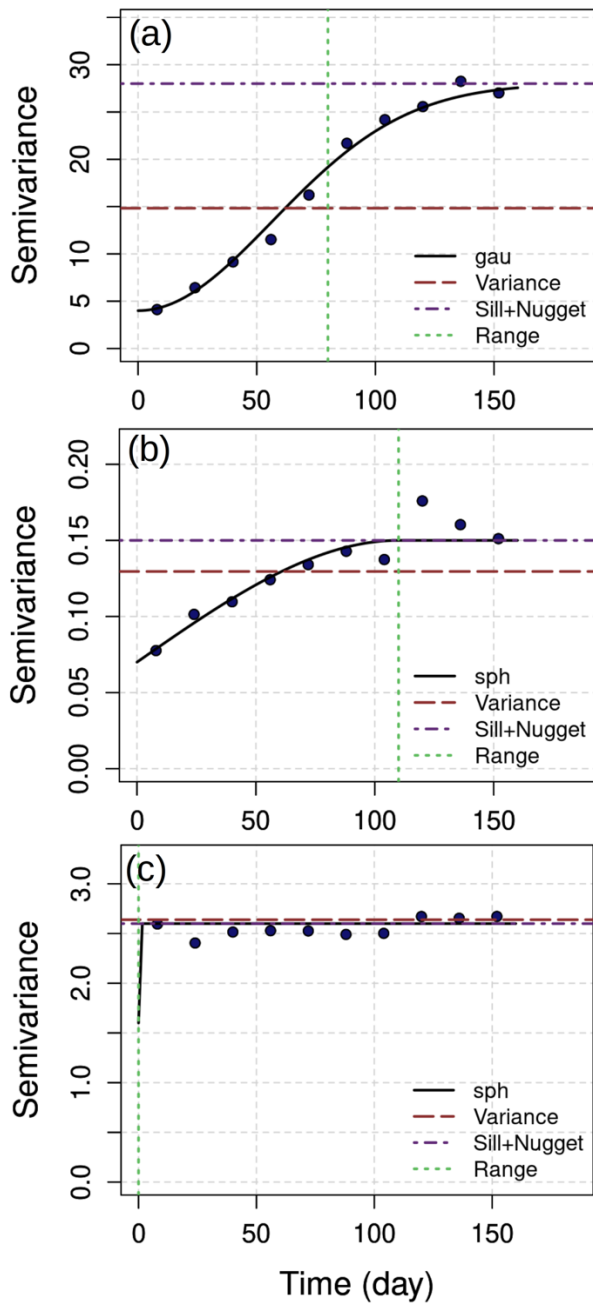

52  
 53  
 54  
 55  
 56  
 57  
 58  
 59

**Figure S2.** Semivariograms of soil CO<sub>2</sub> ( $F_A$  CO<sub>2</sub>; a), soil CH<sub>4</sub> ( $F_A$  CH<sub>4</sub>; b), and soil N<sub>2</sub>O ( $F_A$  N<sub>2</sub>O; c) fluxes. These semivariograms were derived using all available data from automated measurements ( $F_A$ ) of soil greenhouse gas fluxes. Semivariogram fits were gaussian (Gau) or spherical (sph).

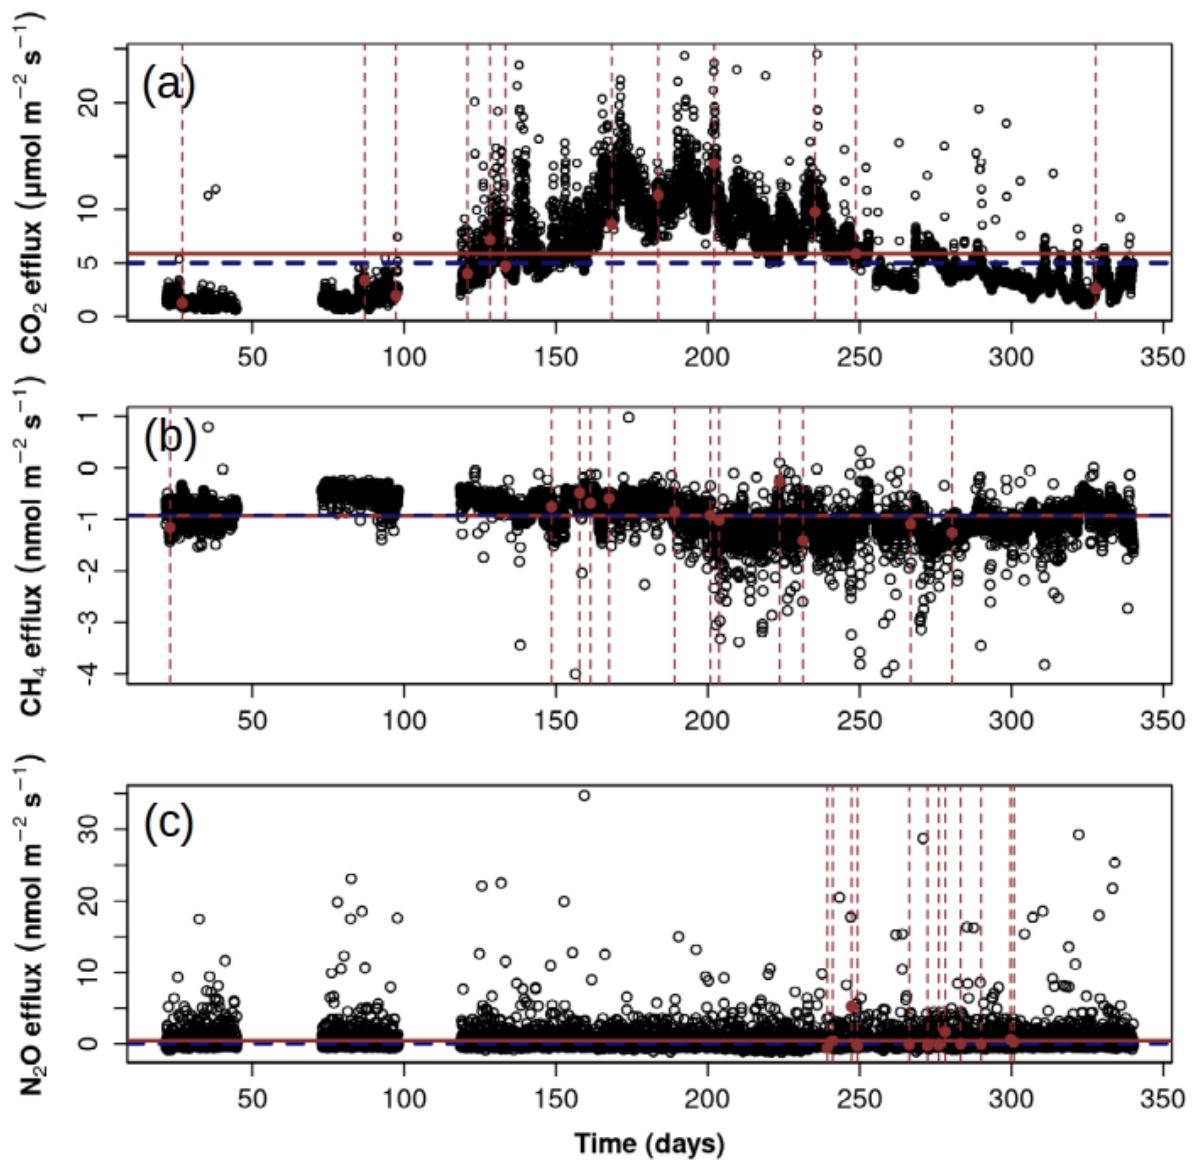

60  
61  
62  
63  
64  
65  
66  
67  
68  
69  
70  
71  
72

**Figure S3.** Time series of automated measurements (FA) of soil greenhouse gas fluxes (black circles) and optimized samples ( $k=12$ ) using a temporal univariate Latin Hypercube sampling (*tuLHs*) approach for soil CO<sub>2</sub> (a), soil CH<sub>4</sub> (b) and soil N<sub>2</sub>O (c) fluxes. The horizontal red line represents the mean, and the horizontal blue line is the median of each greenhouse gas flux derived from automated measurements. Time (x-axis) represents days from January 1 to December 31 of 2015.



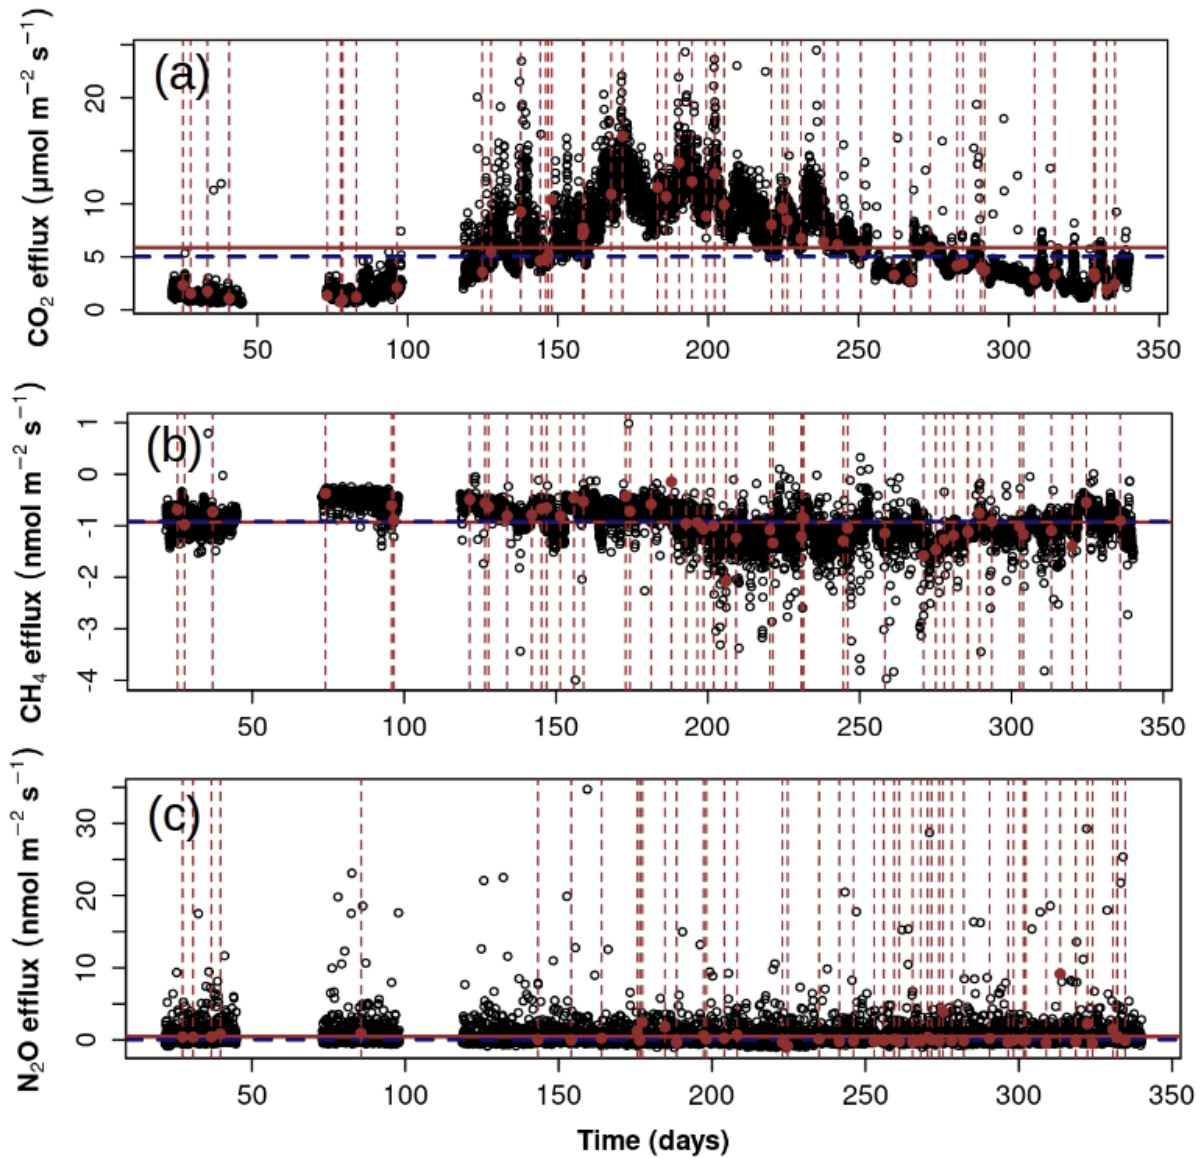

73  
74  
75  
76  
77  
78  
79  
80  
81  
82  
83  
84  
85  
86  
87  
88

**Figure S4.** Time series of automated measurements (FA) of soil greenhouse gas fluxes (black circles) and optimized samples ( $k=48$ ) using a temporal univariate Latin Hypercube sampling (*tuLHs*) approach for soil CO<sub>2</sub> (a), soil CH<sub>4</sub> (b) and soil N<sub>2</sub>O (c) fluxes. The horizontal red line represents the mean, and the horizontal blue line is the median of each greenhouse gas flux derived from automated measurements. Time (x-axis) represents days from January 1 to December 31 of 2015.

89  
90

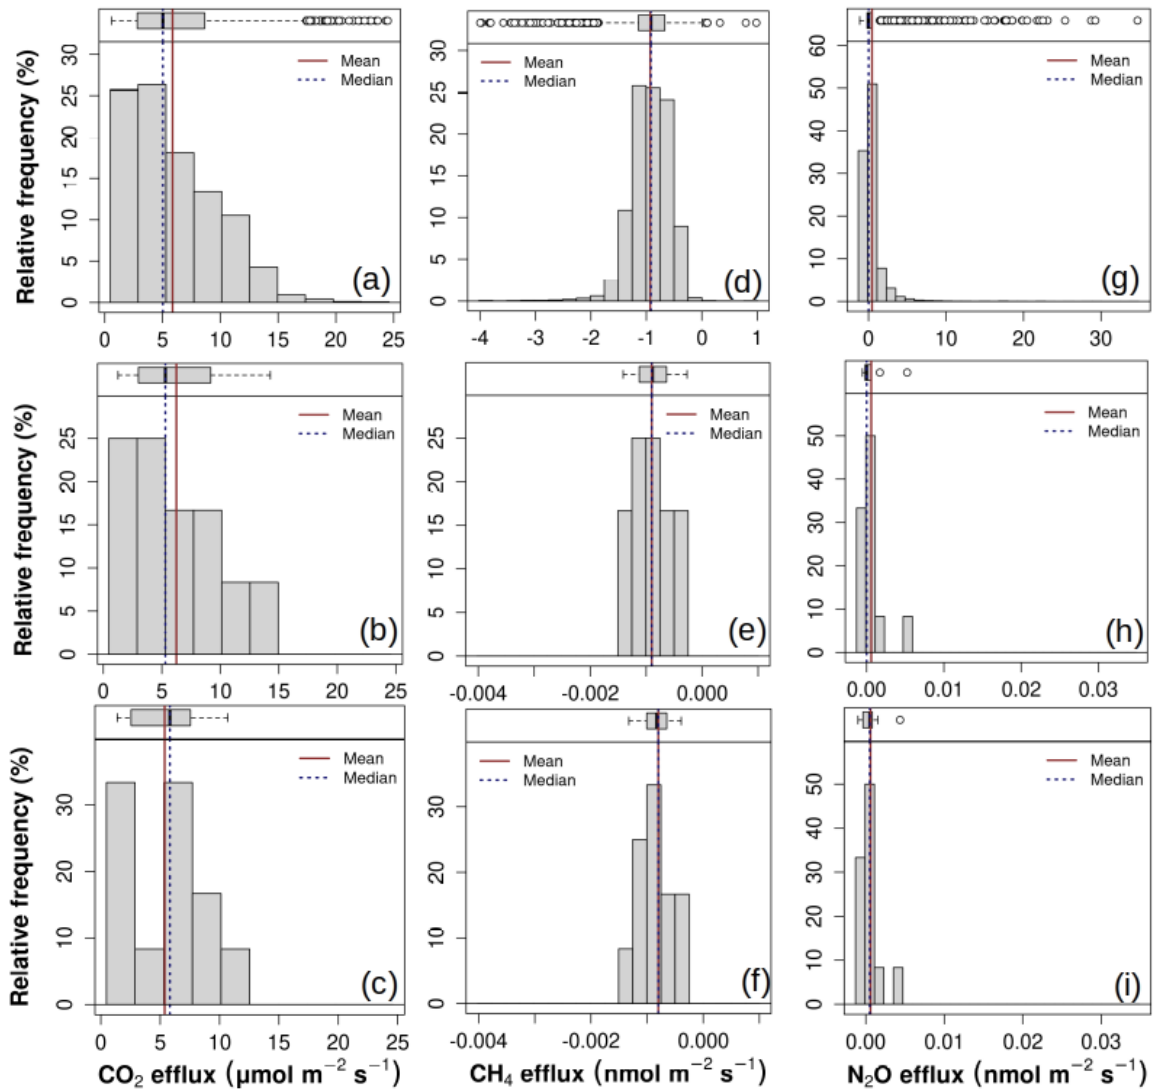

91  
92  
93  
94  
95  
96  
97  
98  
99  
100

**Figure S5.** Histograms for automated measurements of soil CO<sub>2</sub> ( $F_A$  CO<sub>2</sub>; a), soil CH<sub>4</sub> ( $F_A$  CH<sub>4</sub>; d), and soil N<sub>2</sub>O ( $F_A$  N<sub>2</sub>O; g) fluxes. Histograms for optimized samples ( $k=12$ ) using a temporal univariate Latin Hypercube sampling (*tuLHs*) approach for soil CO<sub>2</sub> (b), soil CH<sub>4</sub> (e), and soil N<sub>2</sub>O (h) fluxes. Histograms for fixed temporal stratification (i.e., stratified manual sampling schedule;  $k=12$ ) for soil CO<sub>2</sub> (c), soil CH<sub>4</sub> (f), and soil N<sub>2</sub>O (i) fluxes.

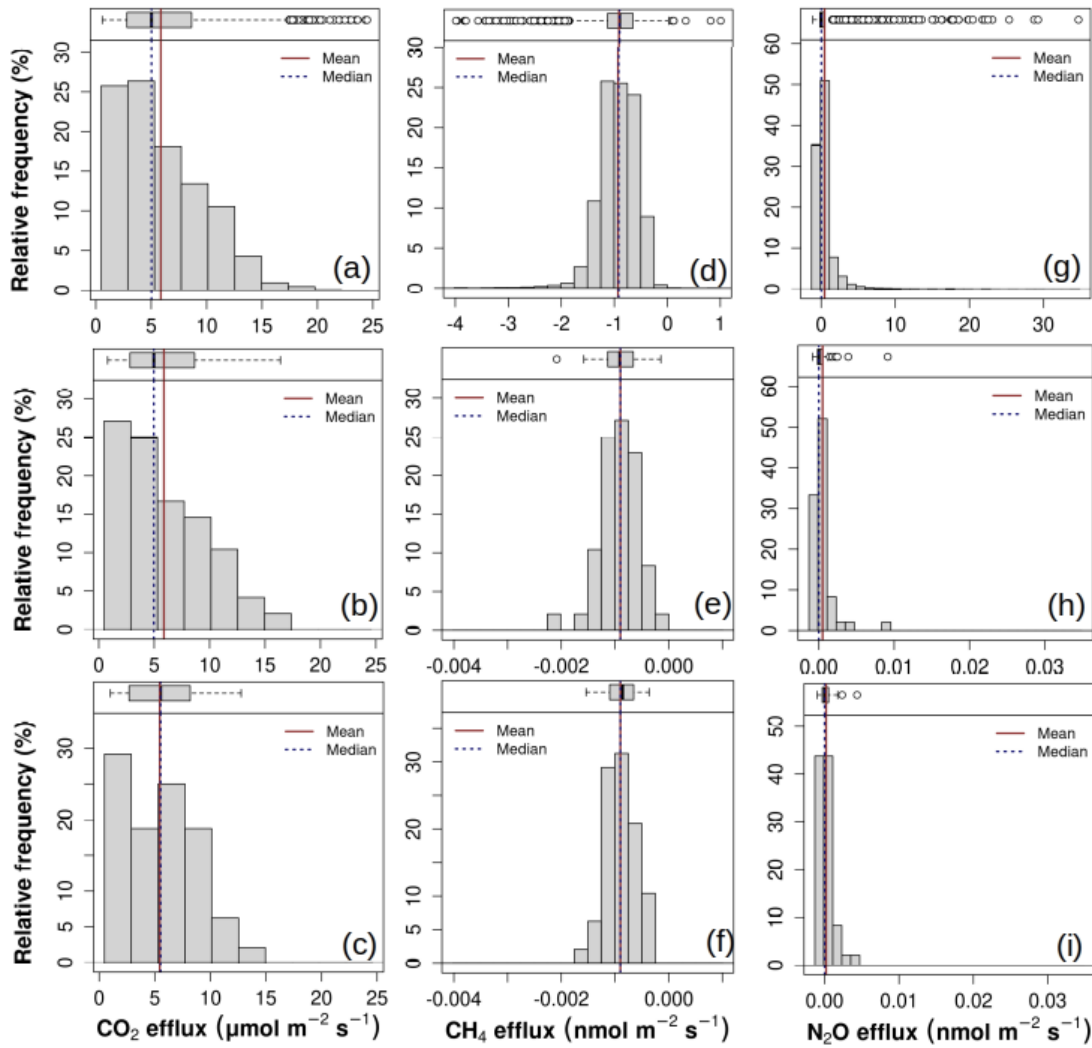

102  
 103  
 104  
 105  
 106  
 107  
 108  
 109  
 110

**Figure S6.** Histograms for automated measurements of soil CO<sub>2</sub> ( $F_A$  CO<sub>2</sub>; a), soil CH<sub>4</sub> ( $F_A$  CH<sub>4</sub>; d), and soil N<sub>2</sub>O ( $F_A$  N<sub>2</sub>O; g) fluxes. Histograms for optimized samples ( $k=48$ ) using a temporal univariate Latin Hypercube sampling (*tuLHs*) approach for soil CO<sub>2</sub> (b), soil CH<sub>4</sub> (e), and soil N<sub>2</sub>O (h) fluxes. Histograms for fixed temporal stratification (i.e., stratified manual sampling schedule;  $k=48$ ) for soil CO<sub>2</sub> (c), soil CH<sub>4</sub> (f), and soil N<sub>2</sub>O (i) fluxes.

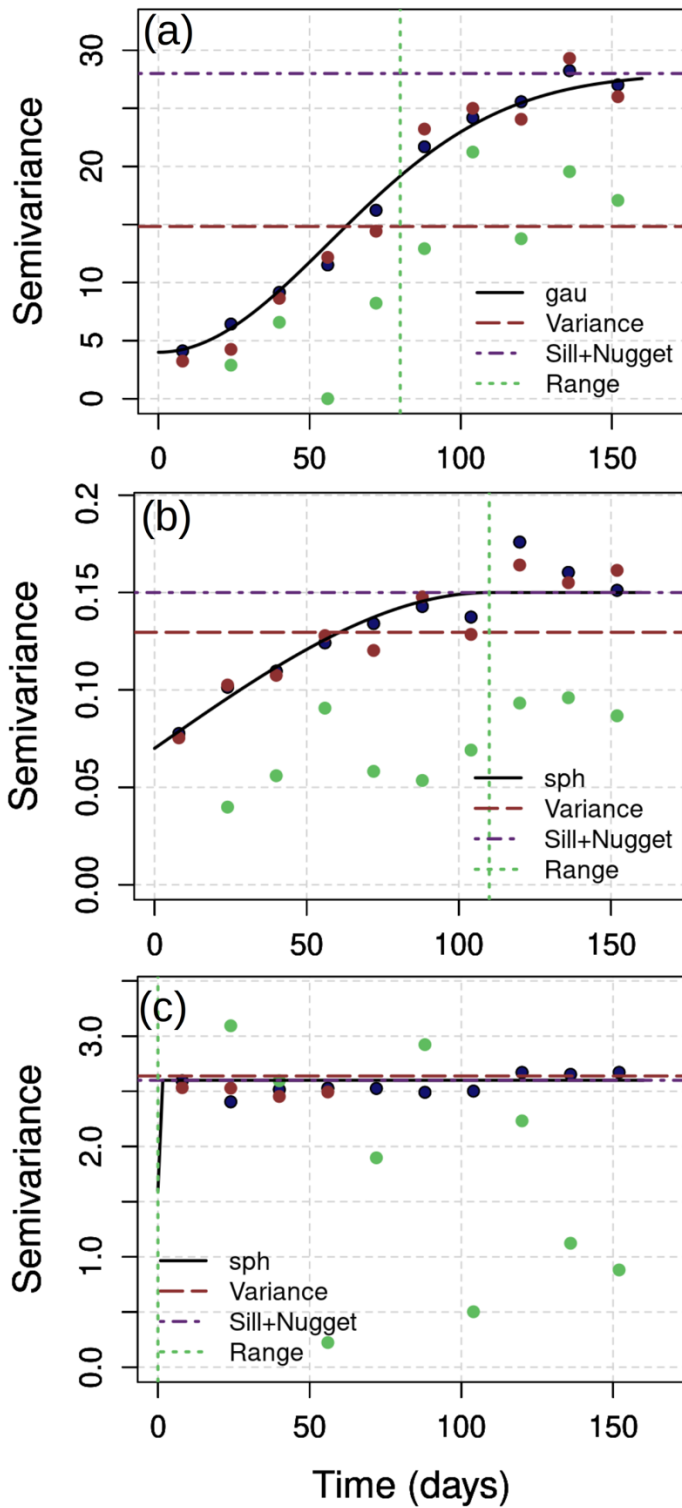

111  
 112  
 113  
 114  
 115  
 116

**Figure S7.** Comparison of semivariograms between automated measurements ( $F_A$ ) of soil greenhouse gas fluxes (solid black line) and for optimized (red circles) or fixed temporal stratification (green circles) with  $k=12$ . Semivariograms are presented for soil CO<sub>2</sub> (a), CH<sub>4</sub> (d), and N<sub>2</sub>O (c) fluxes. Semivariogram fits were gaussian (Gau) or spherical (sph). 12

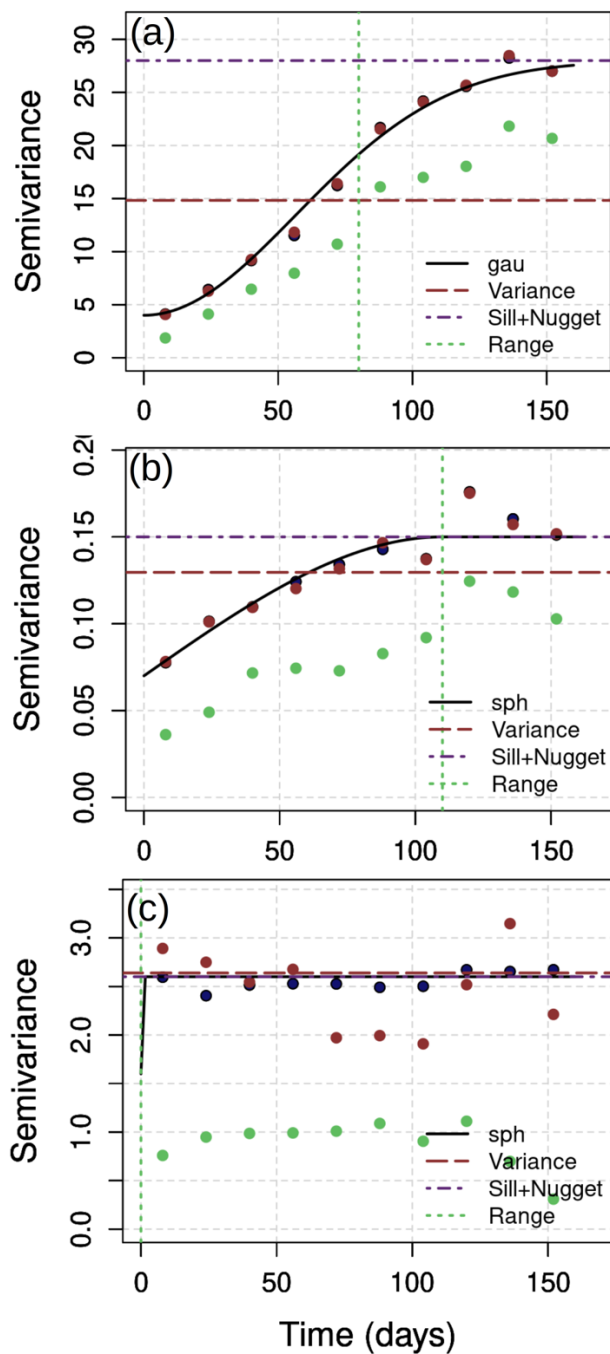

118  
 119  
 120  
 121  
 122  
 123  
 124  
 125  
 126

**Figure S8.** Comparison of semivariograms between automated measurements ( $F_A$ ) of soil greenhouse gas fluxes (solid black line) and for optimized (red circles) or fixed temporal stratification (green circles) with  $k=48$ . Semivariograms are presented for soil CO<sub>2</sub> (a), CH<sub>4</sub> (d), and N<sub>2</sub>O (c) fluxes. Semivariogram fits were gaussian (Gau) or spherical (sph).
